# Supplementary material
Source: Springer Nature journal article supplement (https://www.springermedizin.de/resource/supplementary/12933_2012_525_MOESM4_ESM.pdf/9538668)

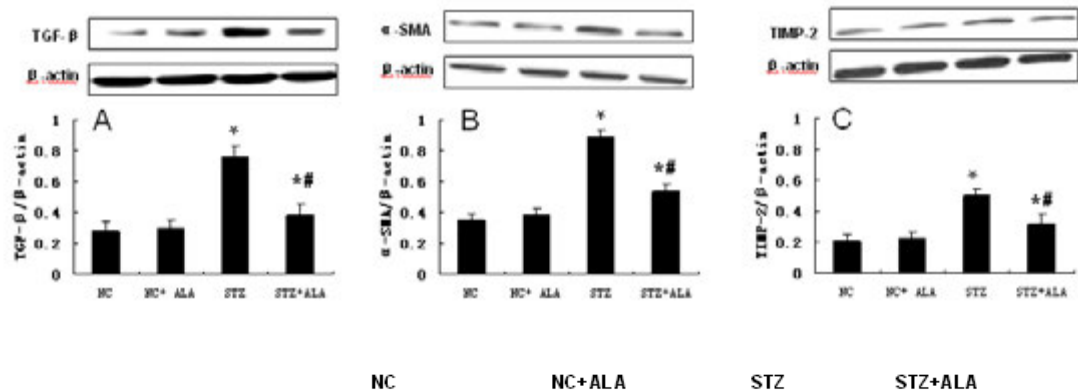

Pro-MMP2 72KD  
Active-MMP2 68KD

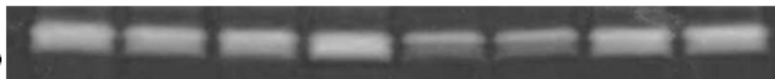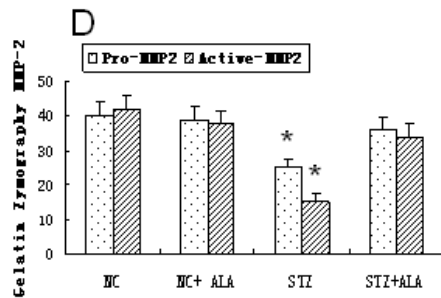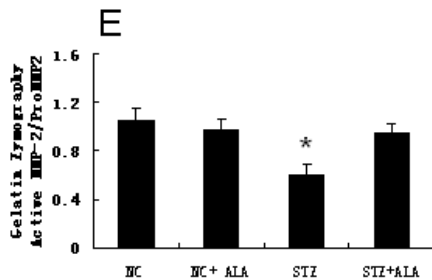

Supplement: MOESM4 [file 9538668]
